# Supplementary material for: Polyethylenimine-based Magnetic Nanocomplexes Enhanced Cisplatin Toxicity on Ovarian Cancer Cells in Presence of Static Magnetic Field
Source: Research Square preprint supplement (doi:10.21203/rs.3.rs-138892/v1), 2021-01-05
Supplement: Supplementary file 1 [file 2c6f04a95e107030b3150b92.docx]

**Table 1**.Zeta potential and size related to Fe3O4 magnetite nanoparticles (MNPs), PEI-MNPs (PM) binary complex including MNPs and polyethylenimine (PEI) and three-component magnetic nanocomplexes (PMC) comprising PEI, MNP and cisplatin.

| **PMC** | **PM** | **MNPs** | **PEI** |  |
| --- | --- | --- | --- | --- |
| 16±6 | 19 ± 2 | -25±4 | 34±3 | **Zeta potential (eV)** |
| 151±21 | 88±15 | 69±5 | 91±17 | **Size (nm)** |

**Table 2.** The inhibitory concentration 50% (IC50) of CIS, PEI, PC, PM, PM/C and PMC treatments were calculated in A2780/CP and A2780 cells in presence and absence of 20 mT static magnetic field (SMF).

| **PMC** | | **PM/C** | | **PM** | | **PC** | | **PEI** | | **CIS** | | **Cells** |
| --- | --- | --- | --- | --- | --- | --- | --- | --- | --- | --- | --- | --- |
| 3.9±  0.9 | 4.8±  0.9 | 4.7±  0.8 | 5.9±  1.3 | 14.5±  2.2 | 25.9±  2.3 | 13.2±  3.1 | 14±  1.1 | 27.4± 2.2 | 28.4± 1.3 | 15.2±  2.3 | 15.7±  1.1 | **A2780/CP (24 h)** |
| 3.2±  0.7 | 3.9±  0.7 | 4±  1.1 | 5.1±  0.8 | 12.5±  3.1 | 23.6±  3.4 | 7.9±  2.9 | 8.5±  0.5 | 20.2±  0.9 | 23.8±  3.1 | 10.1±  3.2 | 11.1±  0.6 | **A2780 (24 h)** |
| 1.6±  0.2 | 2.7±  0.2 | 2.7±  0.2 | 3.7±  0.8 | 11±  0.9 | 17.3±  1.7 | 10.1±  0.8 | 11±  1.1 | 18.9±  0.9 | 21.9 ±  2.4 | 13.1 ±  0.3 | 14 ±  0.8 | **A2780/CP (48 h)** |
| 0.6±  0.2 | 1.6±  0.3 | 2.3±  0.3 | 3.2±  0.3 | 9.3±  1.8 | 19.8±  1.9 | 7.3±  0.4 | 8.4±  0.6 | 15.9±  0.3 | 18.4±  1.6 | 9.5±  0.4 | 10.6±  1.2 | **A2780 (48 h)** |
| **+** | **-** | **+** | **-** | **+** | **-** | **+** | **-** | **+** | **-** | **+** | **-** | **SMF (20 mT)** |

**Table 3.** The mechanisms, functions,isoelectric point (pI) and net charge of enzymes involved in the drug resistance of cancer cells.

| **Net charge** | **Isoelectric point (pI)** | **Function** | **Mechanism** | **Enzyme** |
| --- | --- | --- | --- | --- |
| **-1** | **3.3** | GSH scavenges electrophiles and ROS (14) | pre-target resistance | **GSH, reduced glutathione** |
| **-3** | **5.3** | inactivation of cisplatin can occur through conjugation with GSH (13) | pre-target resistance | **GST glutathione S-transferase** |
| **-13** | **5.7** | GST conjugates GSH to CDDP,thus facilitating its extrusion | pre-target resistance | **γ-GCS, g-glutamylcysteine synthetase** |
| **-11.9** | **6.2** | Copper ion transmembrane transporter involved in the export of copper and CDDP out of the cells (9, 10) | pre-target resistance | **ATP7B** |
| **-19.9** | **5.9** | Copper ion transmembrane transporter involved in the export of copper and CDDP out of the cells (10) | pre-target resistance | **ATP7A** |
